# Supplementary material for: Using hydrological and climatic catchment clusters to explore drivers of catchment behavior
Source: Copernicus journal article supplement (doi:10.5194/hess-24-1081-2020), 2020-03-05
Supplement: Supplementary file 1 [file hess-24-1081-2020-supplement.zip]

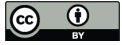

## *Supplement of*

# **Using hydrological and climatic catchment clusters to explore drivers of catchment behavior**

**Florian U. Jehn et al.**

*Correspondence to:* Florian U. Jehn ([florian.u.jehn@umwelt.uni-giessen.de](mailto:florian.u.jehn@umwelt.uni-giessen.de))

- [hess-24-1081-2020-supplement-title-page.pdf](#)
- [gauge\\_pos\\_cluster\\_climate.csv](#)

The copyright of individual parts of the supplement might differ from the CC BY 4.0 License.
